# Supplementary material
Source: MDPI journal article supplement (https://www.mdpi.com/2073-4344/12/5/571)
Supplement: s1 [file s1]

## Supporting Information

### **Pt/C-TiO<sub>2</sub> as Oxygen Reduction Electrocatalysts Against Sulfur Poisoning**

Yuxin Liu <sup>1, 2</sup>, Jing Ye <sup>2</sup>, Fanpeng Kong <sup>2</sup>, Chunyu Du <sup>2</sup>, Pengjian Zuo <sup>2</sup>, Lei Du <sup>3,\*</sup>,  
Geping Yin <sup>2,\*</sup>

<sup>1</sup>College of Chemical and Environmental Engineering, Yancheng Teachers University,  
Yancheng 224051, China;

<sup>2</sup>School of Chemistry and Chemical Engineering, Harbin Institute of Technology, 92  
West Dazhi St., Harbin 150001, China;

<sup>3</sup>Huangpu Hydrogen Innovation Center, School of Chemistry and Chemical  
Engineering, Guangzhou University, Guangzhou, 510006, China;

\*Correspondence: lei.du@gzhu.edu.cn (L.Du); yingeping@hit.edu.cn (G.Yin)

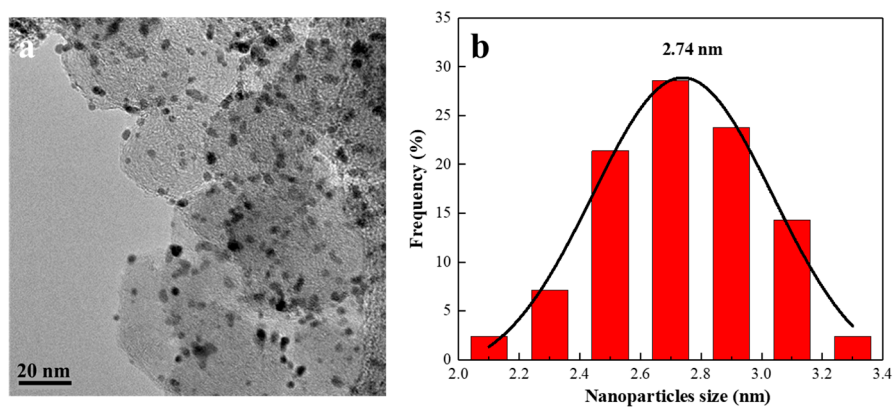

Figure S1. **(a)** TEM images of Pt/C and **(b)** particle size distributions

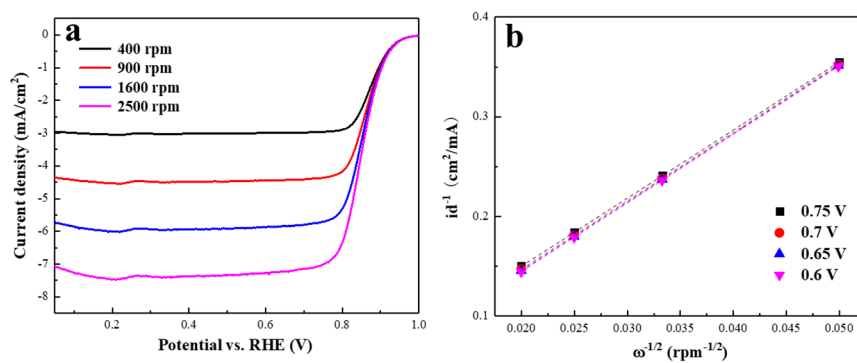

Figure S2 **(a)** The ORR polarization curves of Pt/C-20TiO<sub>2</sub> measured at different electrode rotation speeds; **(b)** The K-L plots from the polarization curve
